# Supplementary material
Source: Springer Nature journal article supplement (https://www.springermedizin.de/resource/supplementary/12943_2011_995_MOESM1_ESM.PDF/9552030)
Supplement: MOESM1 [file 9552030]

**Evidence for the involvement of MutS homologue hMSH5 in cisplatin-induced DNA damage response**

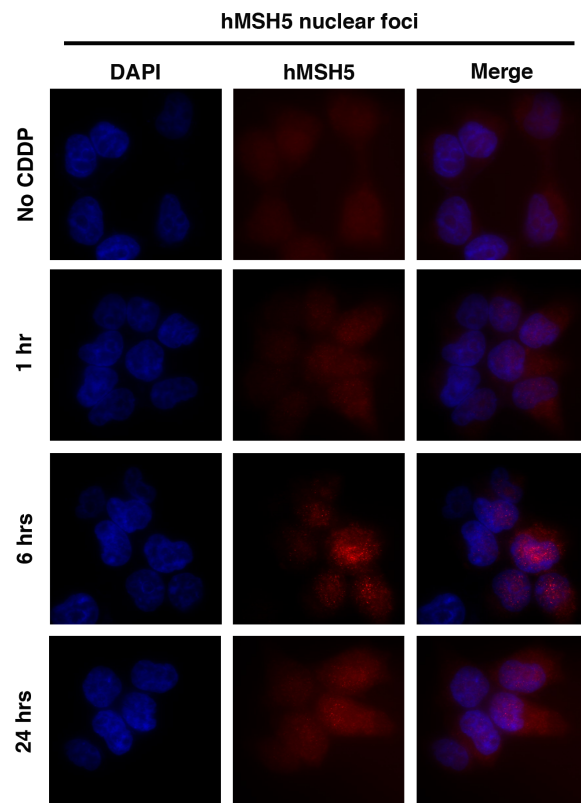

**Fig. S1.** Representative images of CDDP-induced hMSH5 foci formation at 1, 6, and 24 hrs post treatment. Cells were treated with 10  $\mu$ M CDDP for 2 hrs and hMSH5 foci formation was analyzed at indicated time points after treatment.

**Evidence for the involvement of MutS homologue hMSH5 in cisplatin-induced DNA damage response**

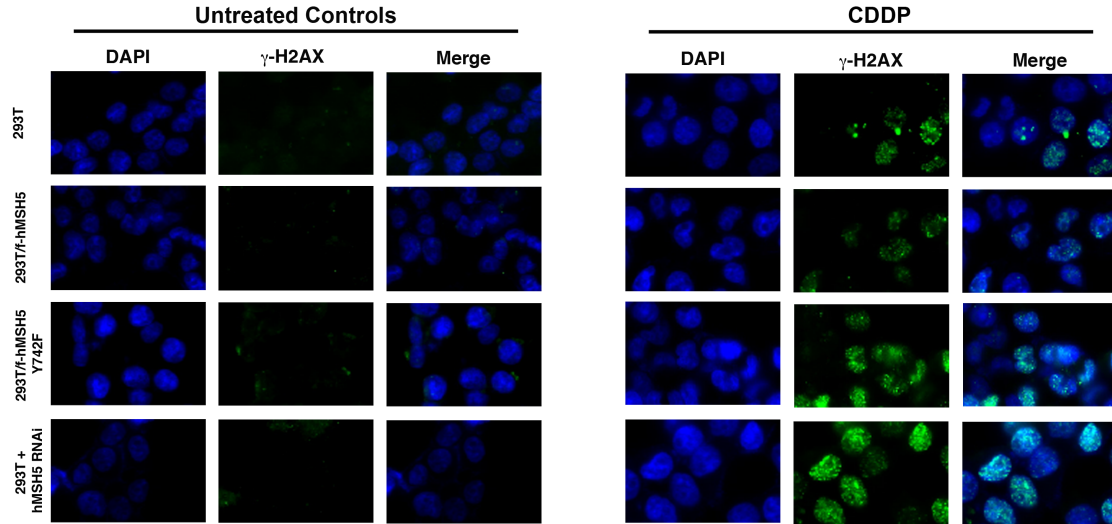

**Fig. S2.** Representative images of cisplatin-induced  $\gamma$ -H2AX foci formation in 293T, 293T/f-hMSH5, 293T/f-hMSH5<sup>Y742F</sup>, as well as 293T hMSH5 RNAi cells (cells subjected to RNAi-mediated hMSH5 silencing; 48 hrs post transfection with pmH1P-Bsd/hMSH5 sh-2). (A) Untreated cells were examined in parallel to establish the basal levels of  $\gamma$ -H2AX signal in these cell lines. (B) Cells were treated with 10  $\mu$ M cisplatin for 2 hrs followed by  $\gamma$ -H2AX foci analysis at 24 hrs after cisplatin removal. Nuclei are counterstained with DAPI and merged images are provided.

**Evidence for the involvement of MutS homologue hMSH5 in cisplatin-induced DNA damage response**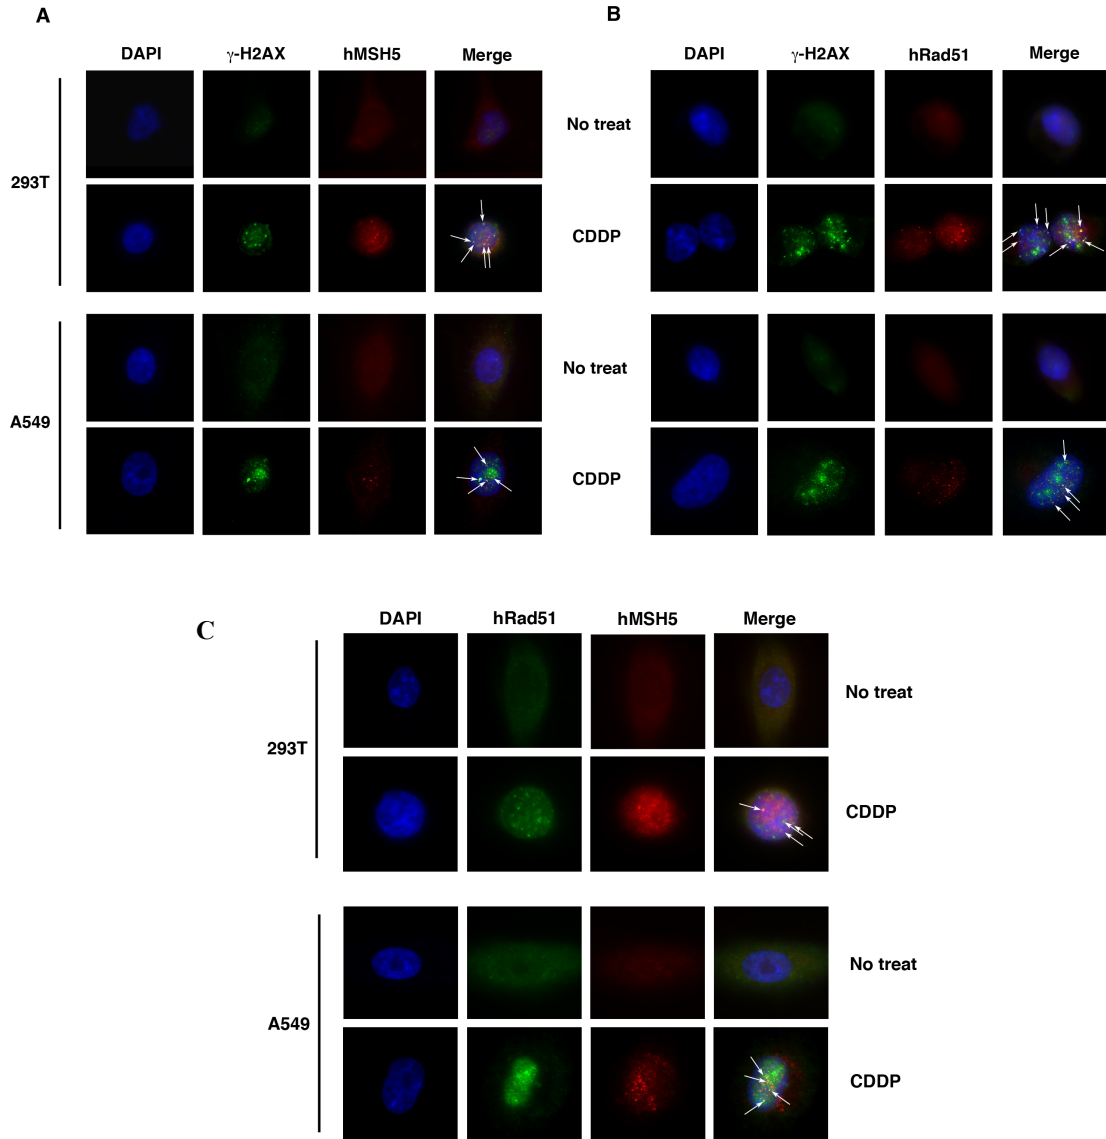

**Fig. S3.** Representative images of CDDP-induced  $\gamma$ -H2AX, hRad51, and hMSH5 foci formation in 293T and A549 cells. (A) Analysis of CDDP-triggered  $\gamma$ -H2AX and hMSH5 foci formation. (B) Analysis of CDDP-triggered  $\gamma$ -H2AX and hRad51 foci formation. (C) Analysis of CDDP-triggered hRad51 and hMSH5 foci formation. Consistent with hMSH5 cytoplasmic and nuclear distribution patterns, CDDP-induced hMSH5 foci appear to present in both cytoplasm and nucleus, whereas CDDP-induced  $\gamma$ -H2AX and hRad51 foci are predominately nuclear. Arrows indicate potential overlaps of two different signals.

**Evidence for the involvement of MutS homologue hMSH5 in cisplatin-induced DNA damage response**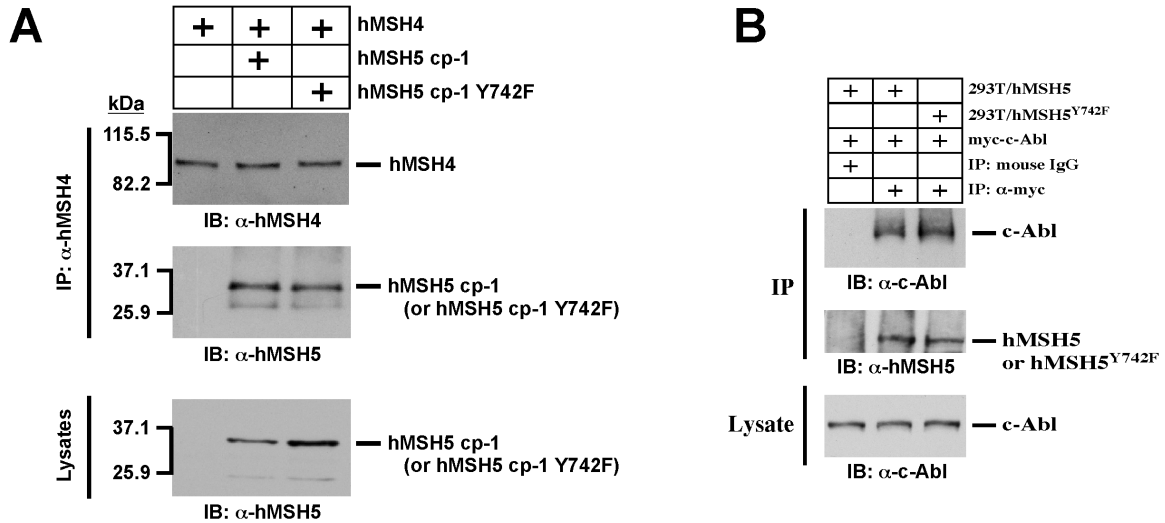

**Fig. S4.** Effects of hMSH5 Tyr<sup>742</sup>-to-Phe mutation on its interaction with hMSH4 and c-Abl. (A) Co-IP analysis of the interaction between hMSH5 cp-1 Y742F and hMSH4. The results indicated that hMSH5 cp-1 Y742F could interact with hMSH4 as efficient as hMSH5 cp-1. (B) Co-IP analysis of the interaction between hMSH5<sup>Y742F</sup> and c-Abl. hMSH5<sup>Y742F</sup> interacted with c-Abl in a same manner as that of hMSH5.
